# Supplementary material for: Effectiveness of music therapy within community hospitals: an EMMPIRE retrospective study
Source: PubMed Central journal article supplement — Pain Rep. 2023 Apr 13;8(3):e1074. doi: 10.1097/PR9.0000000000001074 (PMC10508459; doi:10.1097/pr9.0000000000001074), 2023-04-13
Supplement: painreports-8-e1074-s001.pdf [file painreports-8-e1074-s001.pdf]

**ROC Curve for Model**  
Area Under the Curve = 0.6676

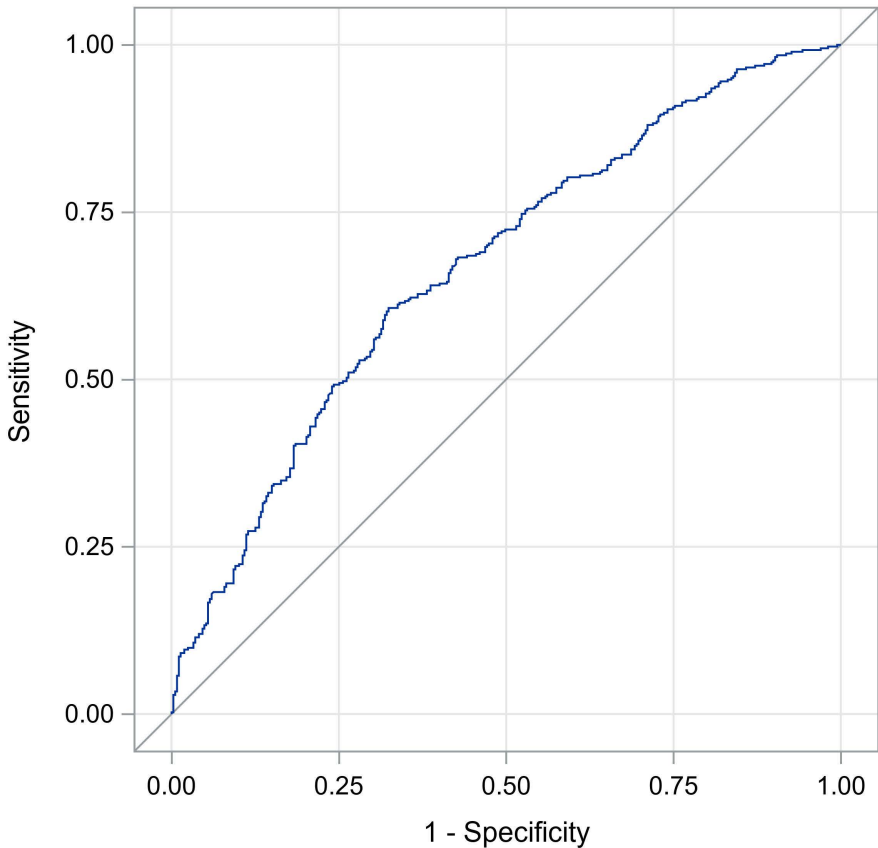

Supplementary Figure 1: ROC Curve for the Model. Abbreviations: ROC – receiver operating characteristic
